# Supplementary material for: Genome-wide mosaicism within Mycobacterium abscessus: evolutionary and epidemiological implications
Source: PubMed Central journal article supplement (PMC4756508; doi:10.1186/s12864-016-2448-1), 2016-02-17
Supplement: 12864_2016_2448_MOESM9_ESM.pdf [file 12864_2016_2448_MOESM9_ESM.pdf]

purH

pta

murC

gnd

glkK

Cya

argH

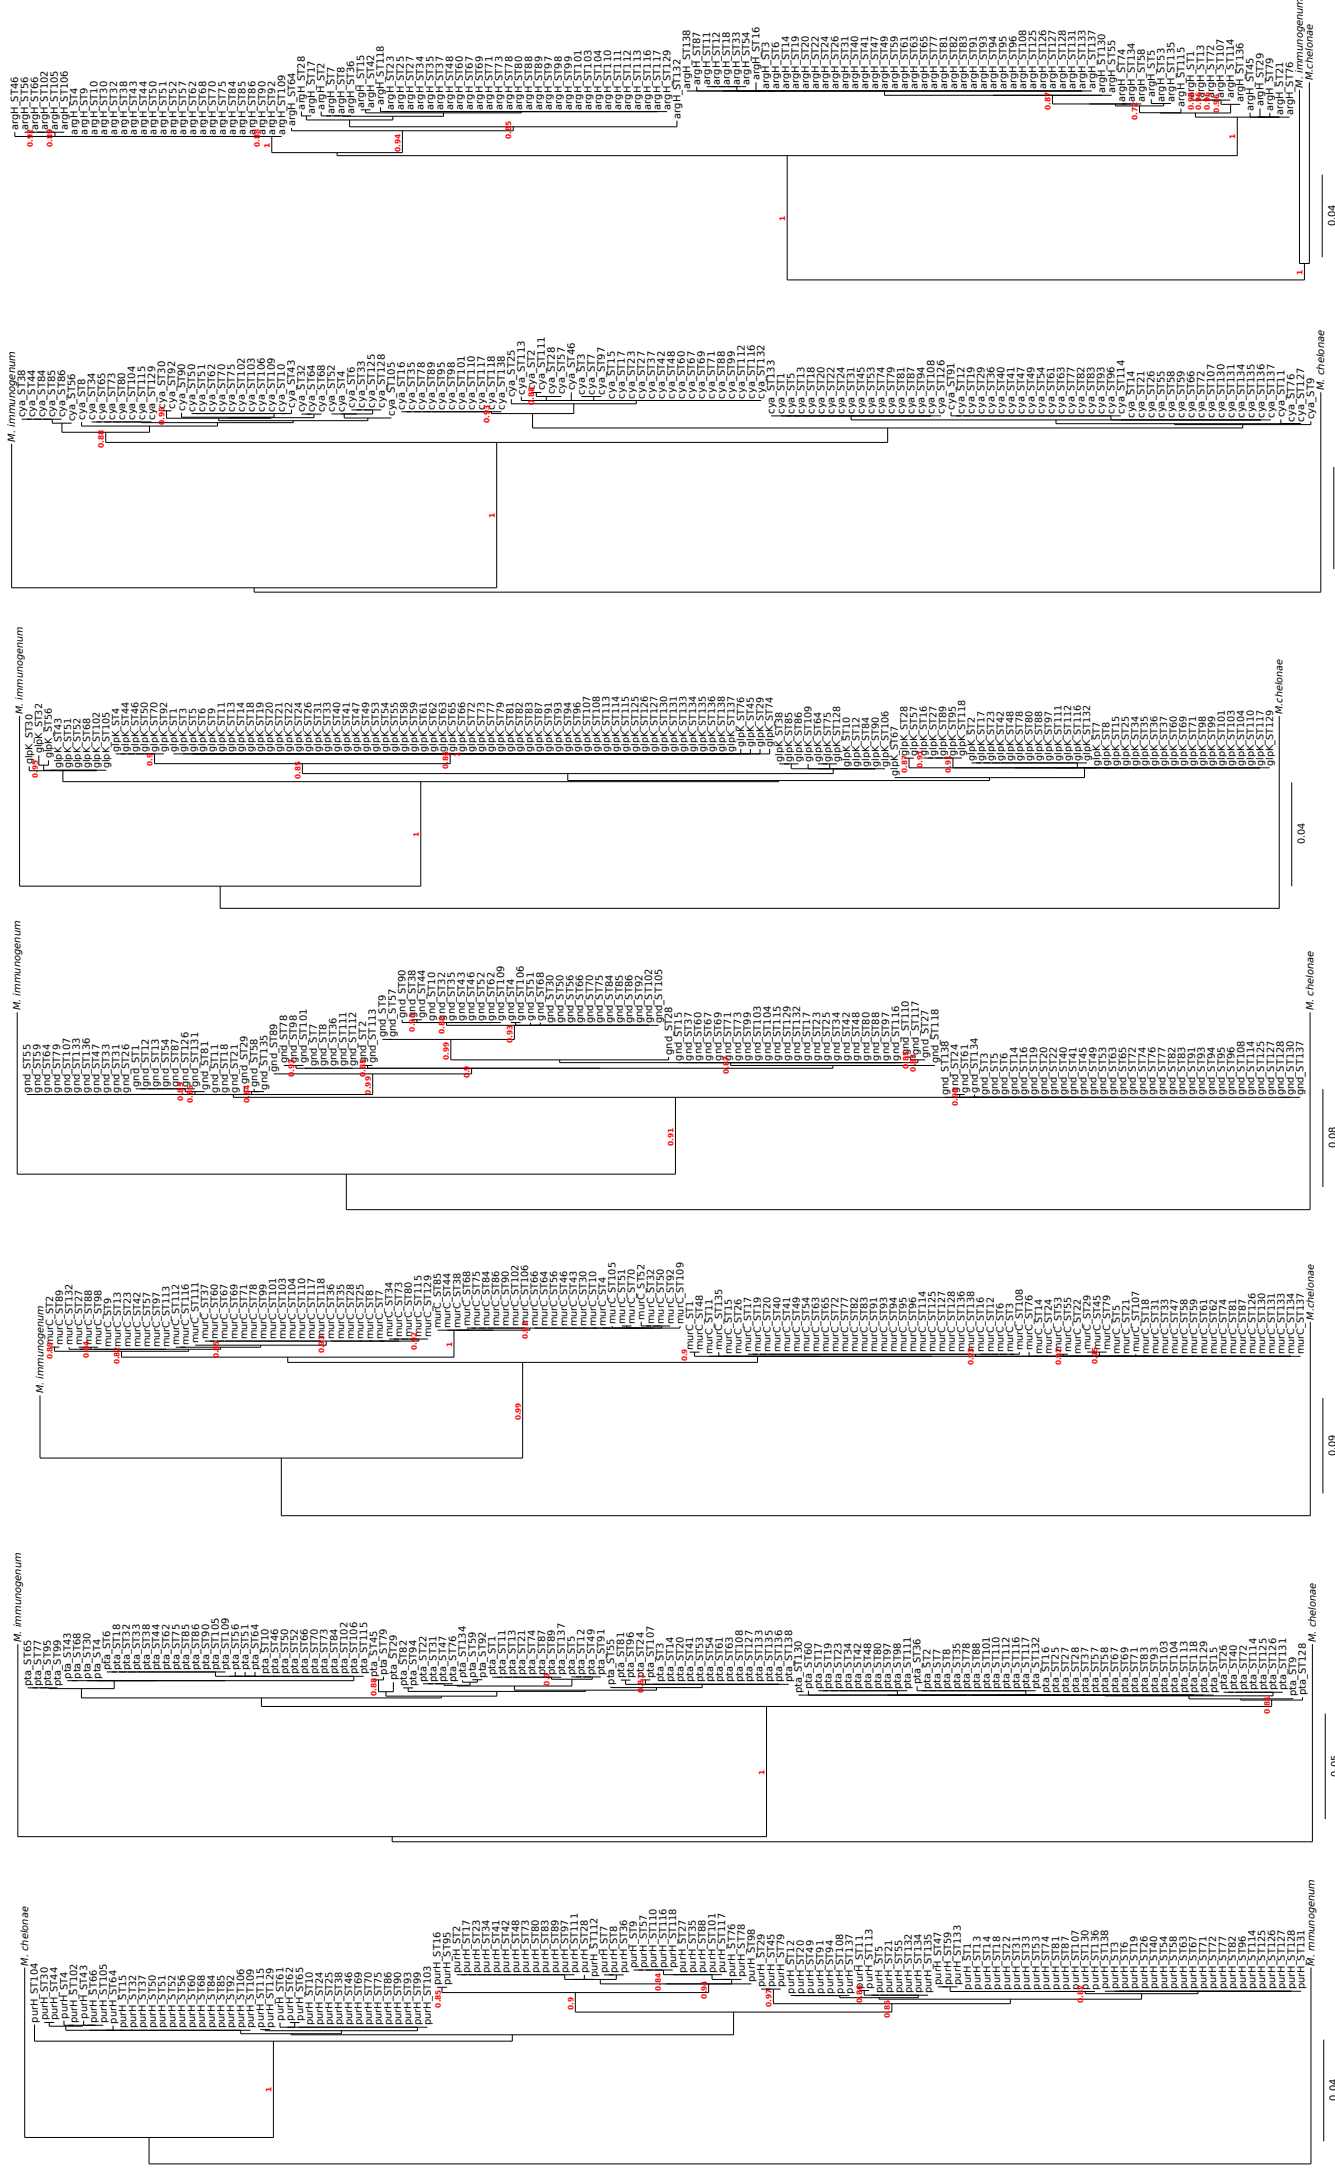

Figure S8
